# Supplementary material for: Histone H2A monoubiquitylation and p38-MAPKs regulate immediate-early gene-like reactivation of latent retrovirus HTLV-1
Source: JCI journal article supplement (doi:10.1172/jci.insight.123196), 2018-10-17
Supplement: sd1 [file 1]

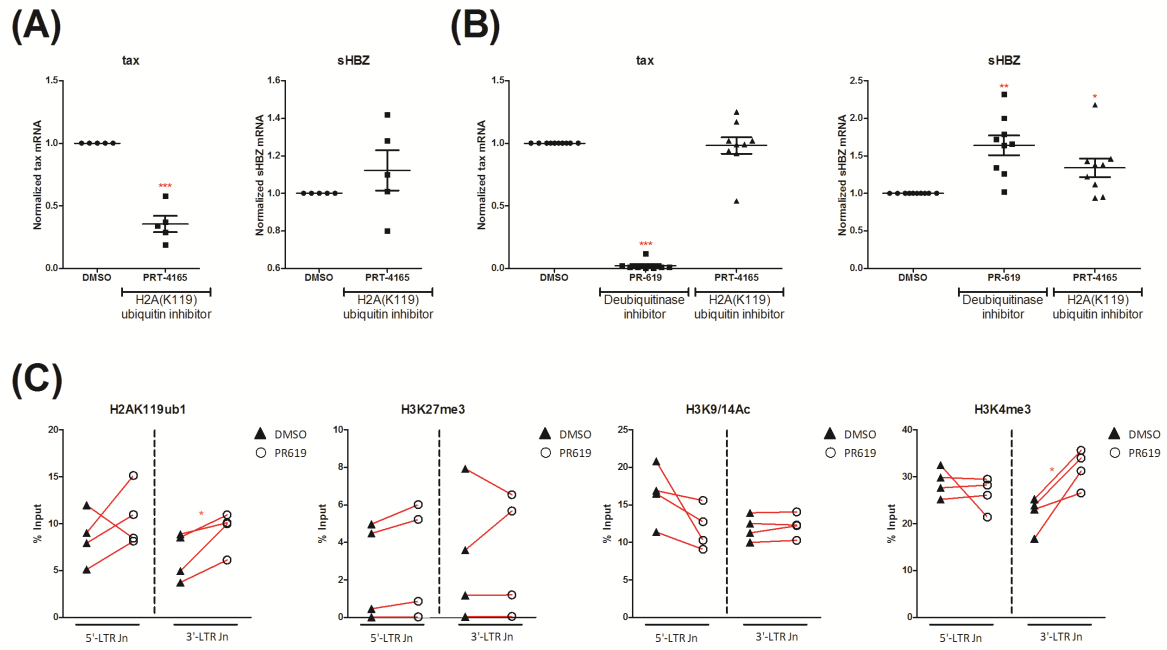

**Supplementary figure 1. Transcriptional and epigenetic impact of PRC1 modulators. (A)** Cryopreserved PBMCs isolated from HTLV-1-infected individuals (N=5) were cultured for 2 hr in the presence of either control (DMSO) or the H2A-ubiquitylation inhibitor PRT4165 (50  $\mu$ M). **(B)** Cryopreserved PBMCs isolated from HTLV-1-infected individuals (N=9) were cultured for 17 hr in the presence of either control (DMSO); the deubiquitinase (DUB) inhibitor PR619 (50  $\mu$ M); or the H2A-ubiquitylation inhibitor PRT4165 (50  $\mu$ M). Cells were harvested for RNA and subjected to qRT-PCR with primers specific for *tax* mRNA (plus-strand) and *sHBZ* mRNA (minus-strand). Error bars represent the SEM. **(C)** Cryopreserved HTLV-1-infected PBMCs (N=4) were fixed after 17 hr of culture in the presence of control (DMSO) or deubiquitinase inhibitor PR619 (50  $\mu$ M). Fixed cells were subjected to ChIP-qPCR, using antibodies directed against H2AK119ub1, H3K27me3, H3K4me3, H3K9/14Ac and IgG, and primers specific respectively for the 5'-LTR and 3'-LTR junctions of the HTLV-1 provirus. Enrichment is expressed as percent input DNA. Statistical significance was calculated using the two-tailed Student's t test (\* $p$  < 0.05, \*\* $p$  < 0.005, \*\*\* $p$  < 0.0005). N=5 for (A); N=9 for (B) and N=4 for (C).

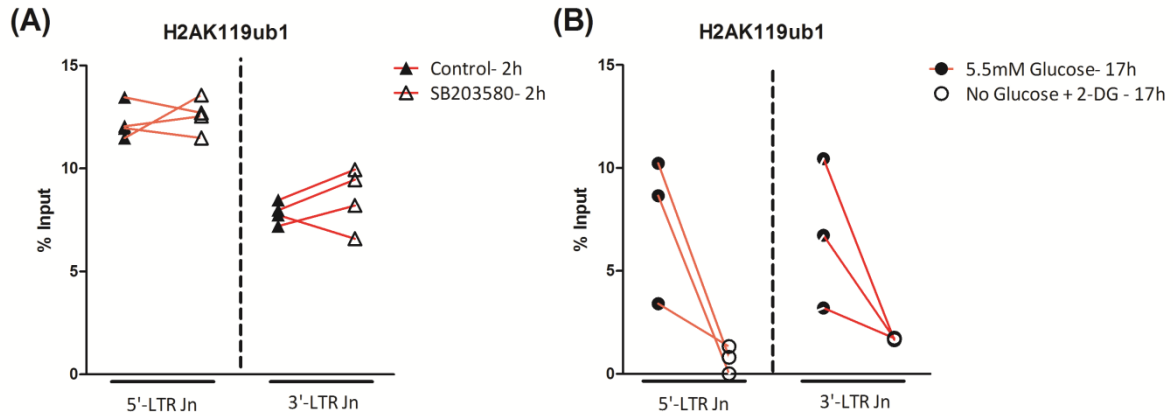

**Supplementary figure 2. Effect of p38-MAPK inhibition and glucose levels on H2AK119ub1 at the HTLV-1 provirus.** Cryopreserved HTLV-1-infected PBMCs were fixed: **(A)** after 2 hr of culture in the presence of a control (DMSO) or p38-MAPK inhibitor (SB203580), and **(B)** after 17 hr of culture in medium containing 5.5mM glucose (5.5mM glucose-17h) or in glucose-free medium containing glycolysis inhibitor 2-deoxy-D-glucose (no glucose + 2-DG-17h). Fixed cells were subjected to CHIP-qPCR, using antibodies directed against H2AK119ub1 or IgG, and primers specific respectively for the 5'-LTR and 3'-LTR junctions of the HTLV-1 provirus. Enrichment is expressed as percent input DNA. N=4 for (A); N=3 for (B).

**Supplementary Table S1. Patient samples used in the study. (Table relates to Figures 1-4; Supplementary Figures 1 and 2)**

| <b>Figure 1</b>  |              |      |     |                 | <b>Figure 4A- H3K4me3</b>   |              |      |     |                                           | <b>Suppl. Fig. 1A</b> |              |      |     |                 |
|------------------|--------------|------|-----|-----------------|-----------------------------|--------------|------|-----|-------------------------------------------|-----------------------|--------------|------|-----|-----------------|
| Sr. No.          | Patient Code | Age  | Sex | Clinical status | Sr. No.                     | Patient Code | Age  | Sex | Clinical status                           | Sr. No.               | Patient Code | Age  | Sex | Clinical status |
| 1                | TDZ          | 61.0 | F   | HAM             | 1                           | TCQ          | 78.0 | M   | HAM                                       | 1                     | TFF          | 55.1 | F   | HAM             |
| 2                | TW           | 52.7 | F   | HAM             | 2                           | TCX          | 50.7 | M   | HAM                                       | 2                     | TEJ          | 52.5 | F   | HAM             |
| 3                | TEB          | 61.6 | M   | HAM             | 3                           | TED          | 59.0 | F   | HAM                                       | 3                     | TCG          | 58.7 | F   | HAM             |
| 4                | HEZ          | 61.7 | F   | AC              | 4                           | TCJ          | 54.6 | F   | HAM                                       | 4                     | TCK          | 69.6 | F   | HAM             |
| 5                | HBX          | 64.6 | F   | AC              |                             |              |      |     |                                           | 5                     | TEF          | 53.3 | M   | HAM             |
| 6                | TCD          | 32.2 | F   | HAM             |                             |              |      |     |                                           |                       |              |      |     |                 |
| 7                | TED          | 59.0 | F   | HAM             |                             |              |      |     |                                           |                       |              |      |     |                 |
| 8                | TEF          | 53.3 | M   | HAM             |                             |              |      |     |                                           |                       |              |      |     |                 |
|                  |              |      |     |                 |                             |              |      |     |                                           |                       |              |      |     |                 |
|                  |              |      |     |                 |                             |              |      |     |                                           |                       |              |      |     |                 |
| <b>Figure 2A</b> |              |      |     |                 | <b>Figure 4A- H3K9/14Ac</b> |              |      |     |                                           | <b>Suppl. Fig. 1B</b> |              |      |     |                 |
| Sr. No.          | Patient Code | Age  | Sex | Clinical status | Sr. No.                     | Patient Code | Age  | Sex | Clinical status                           | Sr. No.               | Patient Code | Age  | Sex | Clinical status |
| 1                | TEB          | 61.6 | M   | HAM             | 1                           | TBC          | 76.5 | F   | HAM                                       | 1                     | TCJ          | 54.6 | F   | HAM             |
| 2                | TET          | 54.3 | F   | HAM             | 2                           | TCX          | 50.7 | M   | HAM                                       | 2                     | TCK          | 69.6 | F   | HAM             |
| 3                | TEP          | 50.8 | F   | HAM             | 3                           | TEB          | 61.6 | M   | HAM                                       | 3                     | TEF          | 53.3 | M   | HAM             |
| 4                | TDZ          | 61.0 | F   | HAM             | 4                           | TED          | 59.0 | F   | HAM                                       | 4                     | TEK          | 43.5 | F   | HAM             |
|                  |              |      |     |                 |                             |              |      |     |                                           | 5                     | TFF          | 55.1 | F   | HAM             |
|                  |              |      |     |                 |                             |              |      |     |                                           | 6                     | TEJ          | 52.5 | F   | HAM             |
|                  |              |      |     |                 |                             |              |      |     |                                           | 7                     | TCQ          | 78.0 | M   | HAM             |
|                  |              |      |     |                 |                             |              |      |     |                                           | 8                     | TCR          | 59.2 | M   | HAM             |
|                  |              |      |     |                 |                             |              |      |     |                                           | 9                     | TCG          | 58.7 | F   | HAM             |
|                  |              |      |     |                 |                             |              |      |     |                                           |                       |              |      |     |                 |
|                  |              |      |     |                 |                             |              |      |     |                                           |                       |              |      |     |                 |
| <b>Figure 2B</b> |              |      |     |                 | <b>Figure 4B- H3K4me3</b>   |              |      |     |                                           | <b>Suppl. Fig. 1C</b> |              |      |     |                 |
| Sr. No.          | Patient Code | Age  | Sex | Clinical status | Sr. No.                     | Patient Code | Age  | Sex | Clinical status                           | Sr. No.               | Patient Code | Age  | Sex | Clinical status |
| 1                | TEB          | 61.6 | M   | HAM             | 1                           | TEB          | 61.6 | M   | HAM                                       | 1                     | TEK          | 43.5 | F   | HAM             |
| 2                | TED          | 59.0 | F   | HAM             | 2                           | TED          | 59.0 | F   | HAM                                       | 2                     | TCK          | 69.6 | F   | HAM             |
| 3                | TBC          | 76.5 | F   | HAM             | 3                           | TCX          | 50.7 | M   | HAM                                       | 3                     | TCG          | 58.7 | F   | HAM             |
| 4                | TCX          | 50.7 | M   | HAM             | 4                           | TCJ          | 54.6 | F   | HAM                                       | 4                     | TEF          | 53.3 | M   | HAM             |
|                  |              |      |     |                 |                             |              |      |     |                                           |                       |              |      |     |                 |
|                  |              |      |     |                 |                             |              |      |     |                                           |                       |              |      |     |                 |
|                  |              |      |     |                 |                             |              |      |     |                                           |                       |              |      |     |                 |
| <b>Figure 3A</b> |              |      |     |                 | <b>Figure 4B- H3K9/14Ac</b> |              |      |     |                                           | <b>Suppl. Fig. 2A</b> |              |      |     |                 |
| Sr. No.          | Patient Code | Age  | Sex | Clinical status | Sr. No.                     | Patient Code | Age  | Sex | Clinical status                           | Sr. No.               | Patient Code | Age  | Sex | Clinical status |
| 1                | TCK          | 69.6 | F   | HAM             | 1                           | TEB          | 61.6 | M   | HAM                                       | 1                     | TCX          | 50.7 | M   | HAM             |
| 2                | TCJ          | 54.6 | F   | HAM             | 2                           | TCY          | 60.0 | F   | HAM                                       | 2                     | TCR          | 59.2 | M   | HAM             |
| 3                | TEJ          | 52.5 | F   | HAM             | 3                           | TCR          | 59.2 | M   | HAM                                       | 3                     | TEB          | 61.6 | M   | HAM             |
| 4                | TBP          | 79.5 | M   | HAM             | 4                           | TCX          | 50.7 | F   | HAM                                       | 4                     | TED          | 59.0 | F   | HAM             |
| 5                | TDZ          | 61.0 | F   | HAM             | 5                           | TED          | 59.0 | F   | HAM                                       |                       |              |      |     |                 |
|                  |              |      |     |                 | 6                           | TCQ          | 78.0 | M   | HAM                                       |                       |              |      |     |                 |
|                  |              |      |     |                 |                             |              |      |     |                                           |                       |              |      |     |                 |
|                  |              |      |     |                 |                             |              |      |     |                                           |                       |              |      |     |                 |
| <b>Figure 3B</b> |              |      |     |                 | <b>Figure 4C</b>            |              |      |     |                                           | <b>Suppl. Fig. 2B</b> |              |      |     |                 |
| Sr. No.          | Patient Code | Age  | Sex | Clinical status | Sr. No.                     | Patient Code | Age  | Sex | Clinical status                           | Sr. No.               | Patient Code | Age  | Sex | Clinical status |
| 1                | TCR          | 59.2 | M   | HAM             | 1                           | TCJ          | 54.6 | F   | HAM                                       | 1                     | TCJ          | 54.6 | F   | HAM             |
| 2                | TEJ          | 52.5 | F   | HAM             | 2                           | TCK          | 69.6 | F   | HAM                                       | 2                     | TCK          | 69.6 | F   | HAM             |
| 3                | TCJ          | 54.6 | F   | HAM             | 3                           | TAD          | 57.8 | F   | HAM                                       | 3                     | TAD          | 57.8 | F   | HAM             |
|                  |              |      |     |                 |                             |              |      |     |                                           |                       |              |      |     |                 |
|                  |              |      |     |                 |                             |              |      |     |                                           |                       |              |      |     |                 |
|                  |              |      |     |                 |                             |              |      |     |                                           |                       |              |      |     |                 |
|                  |              |      |     |                 |                             |              |      |     | <b>AC : Asymptomatic carrier</b>          |                       |              |      |     |                 |
|                  |              |      |     |                 |                             |              |      |     | <b>HAM : HTLV-1 Associated Myelopathy</b> |                       |              |      |     |                 |

**Supplementary Table S2. Chemical compounds and supplier list. (Table relates to Figures 1-4; Supplementary Figures 1 and 2)**

| <b>Sr. No.</b> | <b>Name</b>       | <b>Supplier</b>       | <b>Solvent</b> | <b>Final conc.</b> | <b>Mechanism of action</b>                                                          | <b>Reference</b> |
|----------------|-------------------|-----------------------|----------------|--------------------|-------------------------------------------------------------------------------------|------------------|
| 1              | DMOG              | Cayman Chem.          | DMSO           | 0.5mM              | Broad spectrum 2-OG oxygenase inhibitor<br>(and isocitrate dehydrogenase inhibitor) | (24)             |
| 2              | SB203580          | Cell Guidance Systems | DMSO           | 10μM               | Selective p38-MAPK inhibitor                                                        | (21)             |
| 3              | BIRB-796          | Cell Guidance Systems | DMSO           | 5μM                | Selective p38-MAPK inhibitor                                                        | (21)             |
| 4              | PD184352          | Cell Guidance Systems | DMSO           | 10μM               | Selective ERK-MAPK inhibitor                                                        | (21)             |
| 5              | 2-Deoxy-D-Glucose | Sigma                 | Water          | 10mM               | Glycolysis inhibitor                                                                | (30)             |
| 6              | U0126             | Cell Guidance Systems | DMSO           | 10μM               | Selective ERK-MAPK inhibitor                                                        | (21)             |
| 7              | Anisomycin        | Cayman Chem.          | DMSO           | 5μM                | MAPK Inducer, Protein synthesis inhibitor                                           | (26)             |
| 8              | PR619             | Cayman Chem.          | DMSO           | 50μM               | Broad-spectrum Deubiquitinase Inhibitor                                             | (28)             |
| 9              | PRT4165           | Cayman Chem.          | DMSO           | 50μM               | H2A ubiquitylation inhibitor                                                        | (29)             |

**Supplementary Table S3. Primers and probes used in the study. (Table relates to Figures 1-4; Supplementary Figures 1 and 2)**

| <b>qRT-PCR</b> |             |   |                              |                  |
|----------------|-------------|---|------------------------------|------------------|
| <b>Sr. No</b>  | <b>Gene</b> |   | <b>Sequence</b>              | <b>Reference</b> |
| 1              | Tax         | F | 5'-CCGGCGCTGCTCTCATCCCGGT-3' | (22)             |
|                |             | R | 5'-GGCCGAACATAGTCCCCCAGAG-3' |                  |
| 2              | sHBZ        | F | 5'-GGACGCAGTTCAGGAGGCAC-3'   |                  |
|                |             | R | 5'-CCTCCAAGGATAATAGCCCG-3'   |                  |
| 3              | 18S rRNA    | F | 5'-GTAACCCGTTGAACCCATT-3'    |                  |
|                |             | R | 5'-CCATCCAATCGGTAGTAGCG-3'   |                  |
| 4              | c-fos       | F | 5'-CGGGCTTCAACGCAGACTA-3'    | (25)             |
|                |             | R | 5'-GGTCCGTGCAGAAGTCCTG-3'    |                  |
| 5              | ATF3        | F | 5'-TGATGCAACGCTCTCCAAGC-3'   | (32)             |
|                |             | R | 5'-TTAGCTCTGCAATGTTCTTC-3'   |                  |
| 6              | GAPDH       | F | 5'-CGGAGTCAACGGATTTGGTC-3'   |                  |
|                |             | R | 5'-AAGCTTCCCGTTCTCAGCC-3'    |                  |

| <u>ChIP-qPCR</u>   |                    |   |                                                            |      |
|--------------------|--------------------|---|------------------------------------------------------------|------|
| 1                  | 5'-LTR<br>Junction | F | 5'-GACAGCCCATCCTATAGCACTC-3'                               | (22) |
|                    |                    | R | 5'-CTAGCGCTACGGGAAAAGATT-3'                                |      |
| 2                  | 3'-LTR<br>Junction | F | 5'-AATACACCAACATCCCCATTTC-3'                               |      |
|                    |                    | R | 5'-GTTTTTCACTGGGAGGCTCTAA-3'                               |      |
| 3                  | ATF3<br>promoter   | F | 5'-CGAACTTGCATCACCAGTGC-3'                                 | (32) |
|                    |                    | R | 5'-GGTCGTTTACTCCGTGTTGC-3'                                 |      |
| <u>qPCR Probes</u> |                    |   |                                                            |      |
| 1                  | 5'-LTR<br>Junction |   | FAM -TCGTCCGGGATACGAGCGCC- TAM                             |      |
| 2                  | 3'-LTR<br>Junction |   | FAM -AGAGGCAGATGACAATGACCATGAGCC- TAM                      |      |
| 3                  | ATF3<br>promoter   |   | FAM-AGCATTACGTCAGCCTGGGACTG -TAM                           |      |
| 4                  | ATF3 mRNA          |   | FAM-CACTGCACAGCTCTTCTCTCGC-TAM                             |      |
| 5                  | GAPDH<br>mRNA      |   | FAM-<br>CATTGACCTCAACTACATGGTTTACATGTTCCAATATGATTC-<br>TAM |      |
